# Supplementary material for: Lawns and meadows in urban green space – A comparison from greenhouse gas, drought resilience and biodiversity perspectives
Source: Copernicus journal article supplement (doi:10.5194/bg-2023-107), 2023-07-28
Supplement: Supplementary file 1 [file bg-2023-107-supplement.pdf]

# Supplementary materials

Justine Trémeau<sup>1,2,3,4</sup>, Beñat Olascoaga<sup>4,5,6</sup>, Leif Backman<sup>1</sup>, Esko Karvinen<sup>1</sup>, Henriikka Vekuri<sup>1</sup> and Liisa Kulmala<sup>1,7</sup>

- <sup>1</sup> Finnish Meteorological Institute, Helsinki, Finland
- 5 <sup>2</sup> AgroParisTech – Institut des sciences et industries du vivant et de l'environnement, Palaiseau, France
- <sup>3</sup> Université Paris-Saclay, Orsay, France
- <sup>4</sup> Institute for Atmospheric and Earth System Research (INAR), Department of Physics, Faculty of Science, University of Helsinki, Helsinki, Finland
- <sup>5</sup> School of Resource Wisdom, Department of Biological and Environmental Science, Faculty of Mathematics and Science, University of Jyväskylä, Jyväskylä, Finland
- 10 <sup>6</sup> Helsinki Institute of Sustainability Science (HELSUS), Department of Forest Sciences, Faculty of Agriculture and Forestry, University of Helsinki, Helsinki, Finland
- <sup>7</sup> Institute for Atmospheric and Earth System Research (INAR), Forest Sciences, University of Helsinki, Helsinki, Finland

**Correspondence:** Justine Trémeau (justine.tremeau@fmi.fi) and Liisa Kulmala (liisa.kulmala@fmi.fi)

**Table S1. Main soil characteristics of each site (NA = non-available). Due to Finnish classification, approximations were made for sand (0.06–2.0 mm), silt (0.002–0.06 mm) and clay (<0.002 mm).**

| Site ID    | Experiment | Year | Soil texture | Physical characteristics              |             |             |             | Chemical characteristics |                                 |                            |                            |            |            |          |
|------------|------------|------|--------------|---------------------------------------|-------------|-------------|-------------|--------------------------|---------------------------------|----------------------------|----------------------------|------------|------------|----------|
|            |            |      |              | Soil density<br>(kg m <sup>-3</sup> ) | sand<br>(%) | silt<br>(%) | clay<br>(%) | pH                       | CEC<br>(cmol kg <sup>-1</sup> ) | K<br>(mg L <sup>-1</sup> ) | P<br>(mg L <sup>-1</sup> ) | SOC<br>(%) | SON<br>(%) | CN ratio |
| VKI lawn   | intensive  | 2021 | Sandy loam   | 873                                   | 72.2        | 25.6        | 2.2         | 6.3                      | NA                              | 220                        | 18.0                       | 2.8        | 0.19       | 14.5     |
| VKI meadow | intensive  | 2021 | Sandy loam   | 3166                                  | 72.4        | 17.1        | 10.5        | 6.1                      | NA                              | 120                        | 3.8                        | 2.5        | 0.17       | 14.9     |
| KMP lawn   | intensive  | 2020 | Sandy loam   | 865                                   | 69.5        | 22.1        | 8.4         | 5.6                      | NA                              | 97                         | 12.0                       | 3.8        | 0.25       | 14.8     |
| KMP meadow | intensive  | 2021 | Sandy loam   | 2265                                  | 59.1        | 31.8        | 9.1         | 6.5                      | NA                              | 230                        | 380.0                      | 5.6        | 0.46       | 12.3     |
| JMT3C      | satellite  | 2022 | Silt loam    | NA                                    | 5.2         | 68.9        | 26.0        | 5.3                      | 20.3                            | 220                        | 4.6                        | 5.0        | 0.46       | 10.8     |
| JMT3T      | satellite  | 2022 | Loamy sand   | NA                                    | 73.7        | 23.5        | 2.8         | 6.5                      | 15.8                            | 84                         | 1.9                        | 4.6        | 0.18       | 25.7     |
| JMT7C      | satellite  | 2022 | Loamy sand   | NA                                    | 82.7        | 14.9        | 2.4         | 6.5                      | 16.5                            | 150                        | 26.5                       | 4.0        | 0.26       | 15.0     |
| JMT7T      | satellite  | 2022 | Loamy sand   | NA                                    | 81.4        | 16.0        | 2.6         | 6.5                      | 14.8                            | 155                        | 23.3                       | 3.2        | 0.21       | 15.3     |
| KO4C       | satellite  | 2022 | Sandy loam   | NA                                    | 66.2        | 29.4        | 4.4         | 6.4                      | 15.3                            | 73                         | 2.2                        | 4.4        | 0.29       | 15.4     |
| KO4T       | satellite  | 2022 | Sandy loam   | NA                                    | 63.3        | 32.7        | 4.0         | 6.1                      | 13.8                            | 125                        | 5.2                        | 4.0        | 0.19       | 20.9     |
| PK3C       | satellite  | 2022 | Sandy loam   | NA                                    | 68.8        | 27.6        | 3.6         | 6.2                      | 14.5                            | 92                         | 2.2                        | 4.0        | 0.19       | 21.1     |
| PK3T       | satellite  | 2022 | Sandy loam   | NA                                    | 68.4        | 27.1        | 4.5         | 6.1                      | 15.0                            | 99                         | 2.8                        | 5.4        | 0.32       | 17.2     |
| SK1C       | satellite  | 2022 | Sandy loam   | NA                                    | 57.3        | 33.9        | 8.8         | 5.6                      | 15.5                            | 125                        | 3.3                        | 4.5        | 0.37       | 12.3     |
| SK1T       | satellite  | 2022 | Sandy loam   | NA                                    | 54.1        | 36.5        | 9.4         | 5.4                      | 13.3                            | 163                        | 4.0                        | 4.2        | 0.35       | 12.0     |
| SMT12C     | satellite  | 2022 | Loam         | NA                                    | 47.7        | 42.7        | 9.7         | 5.8                      | 11.3                            | 155                        | 5.6                        | 3.6        | 0.29       | 12.8     |
| SMT12T     | satellite  | 2022 | Loam         | NA                                    | 51.8        | 39.6        | 8.6         | 6.1                      | 16.5                            | 160                        | 5.3                        | 4.4        | 0.31       | 14.2     |

Table S2. Model parameters used in JSBACH

| Parameters     | Sites    |          |            |            |
|----------------|----------|----------|------------|------------|
|                | KMP lawn | VKI lawn | KMP meadow | VKI meadow |
| root depth     | 0.12     | 0.12     | 0.20       | 0.18       |
| field capacity | 0.14     | 0.05     | 0.11       | 0.05       |
| wilting point  | 0.34     | 0.25     | 0.33       | 0.21       |
| max LAI        | 2.2      | 1.6      | 4.1        | 1.1        |
| fcrit          | 0.9      | 0.9      | 0.8        | 0.9        |
| fwilt          | 0.33     | 0.2      | 0.28       | 0.28       |

25

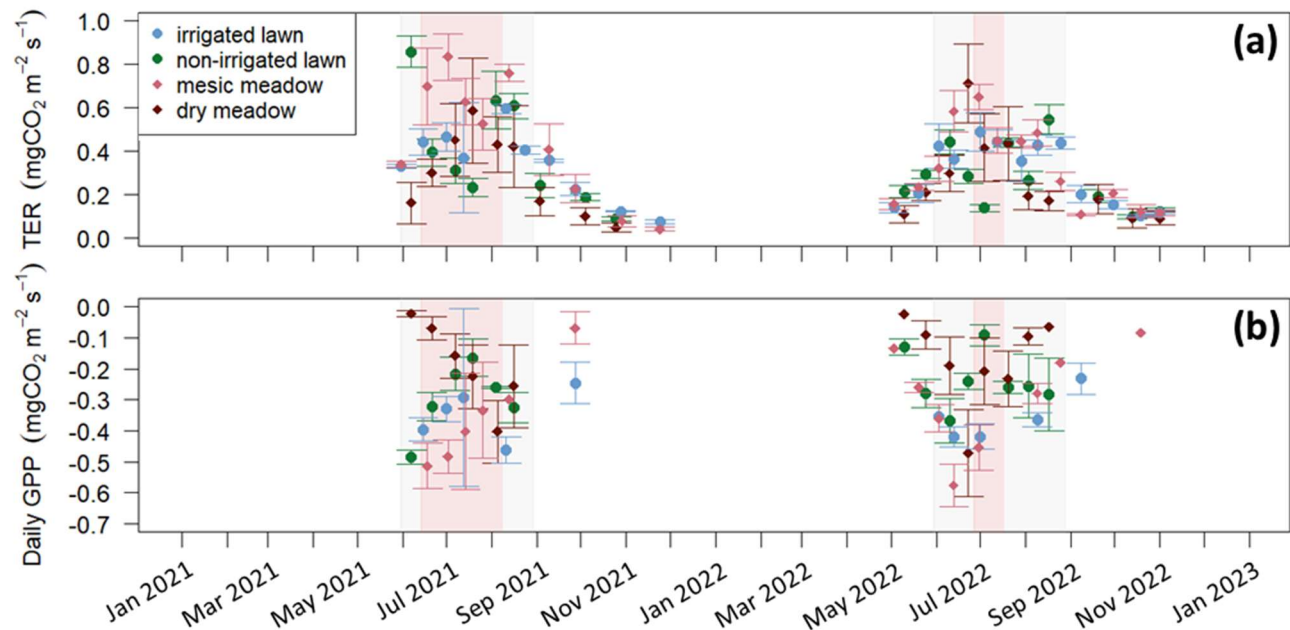

Figure S1. Dynamics of the measured TER (a) and calculated daily GPP (b), where irrigated lawn is KMP lawn, non-irrigated lawn is VKI lawn, mesic meadow is KMP meadow, and dry meadow is VKI meadow. Red rectangles indicate the drought periods according to the SPEI and light grey rectangles represent the summer season.

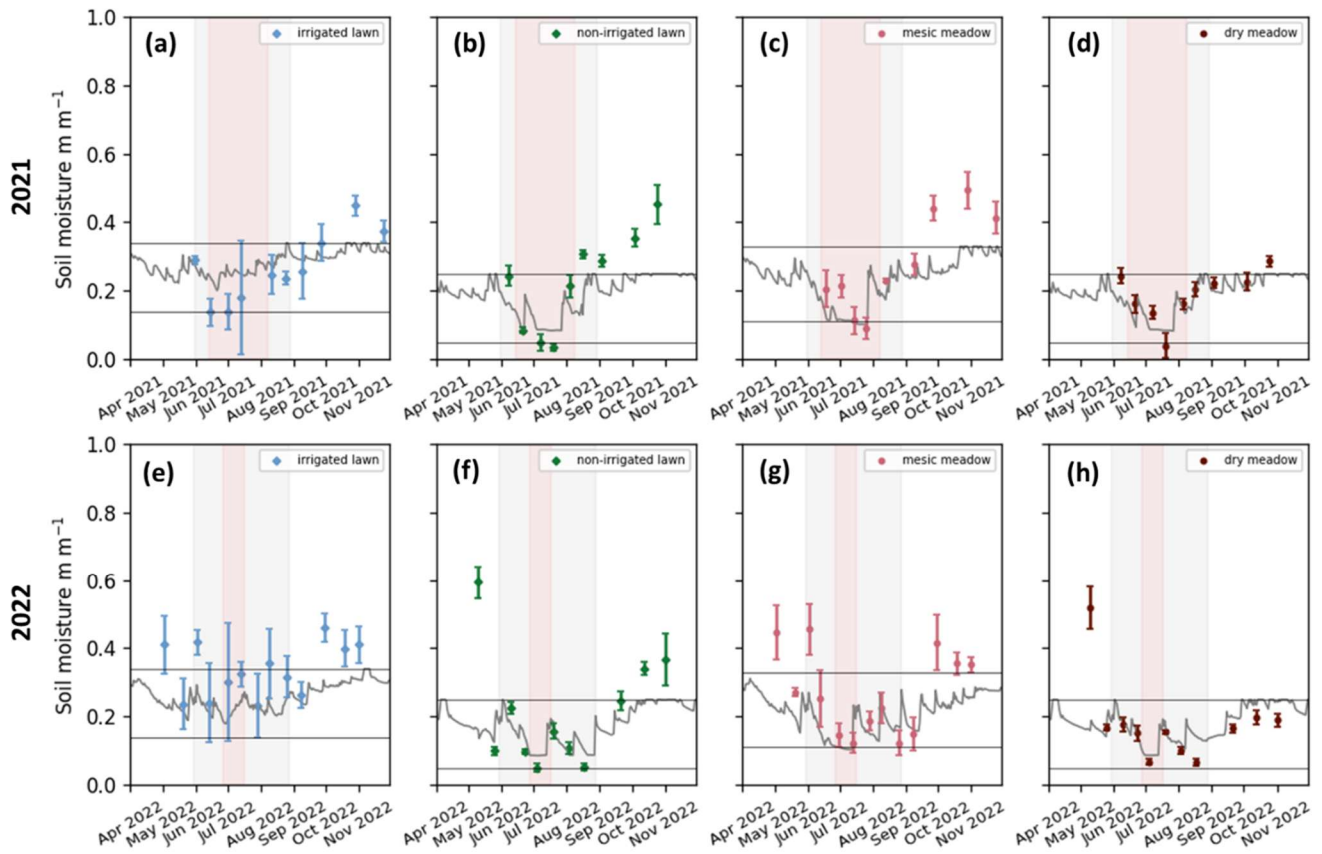

Figure S2. Annual dynamics of soil moisture at the four intensive sites. Grey continuous lines represent JSBACH simulations and diamonds and dots represent the mean of manual measurements with standard deviation bars. (a, e) Irrigated lawn = KMP lawn; (b, f) non-irrigated lawn = VKI lawn; (c, g) mesic meadow = KMP meadow; (d, h) dry meadow = VKI meadow. Red rectangles indicate the drought periods according to the SPEI and light grey rectangles represent the summer season.

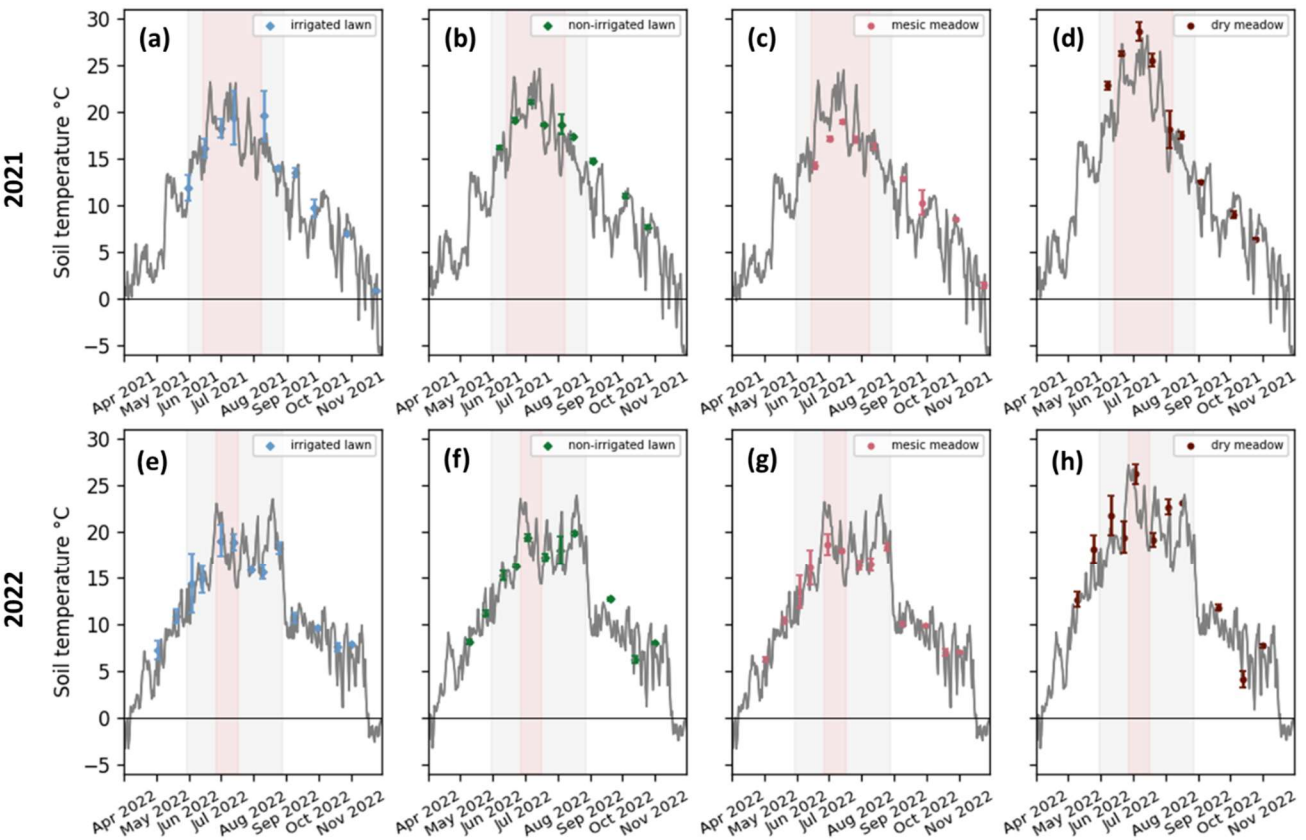

Figure S3. Annual dynamics of soil temperature at the four intensive sites. Grey continuous lines represent JSBACH simulations and diamonds and dots represent the mean of manual measurements with standard deviation bars. (a, e) Irrigated lawn = KMP lawn; (b, f) non-irrigated lawn = VKI lawn; (c, g) mesic meadow = KMP meadow; (d, h) dry meadow = VKI meadow. Red rectangles indicate the drought periods according to the SPEI and light grey rectangles represent the summer season.

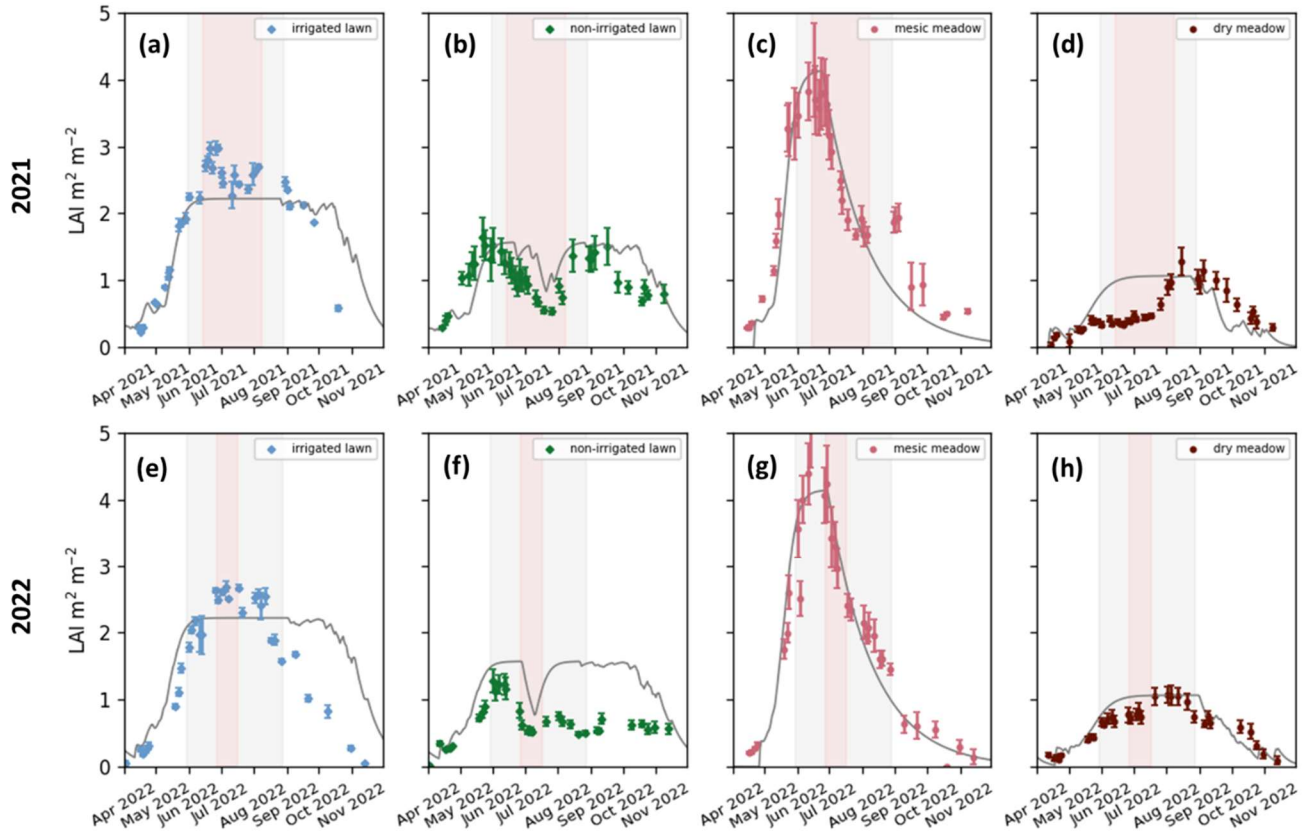

Figure S4. Annual dynamics of leaf area index (LAI) at the four intensive sites. Grey continuous lines represent JSBACH simulations and diamonds and dots represent the mean of manual measurements with standard deviation bars. (a, e) Irrigated lawn = KMP lawn; (b, f) non-irrigated lawn = VKI lawn; (c, g) mesic meadow = KMP meadow; (d, h) dry meadow = VKI meadow. Red rectangles indicate the drought periods according to the SPEI and light grey rectangles represent the summer season.

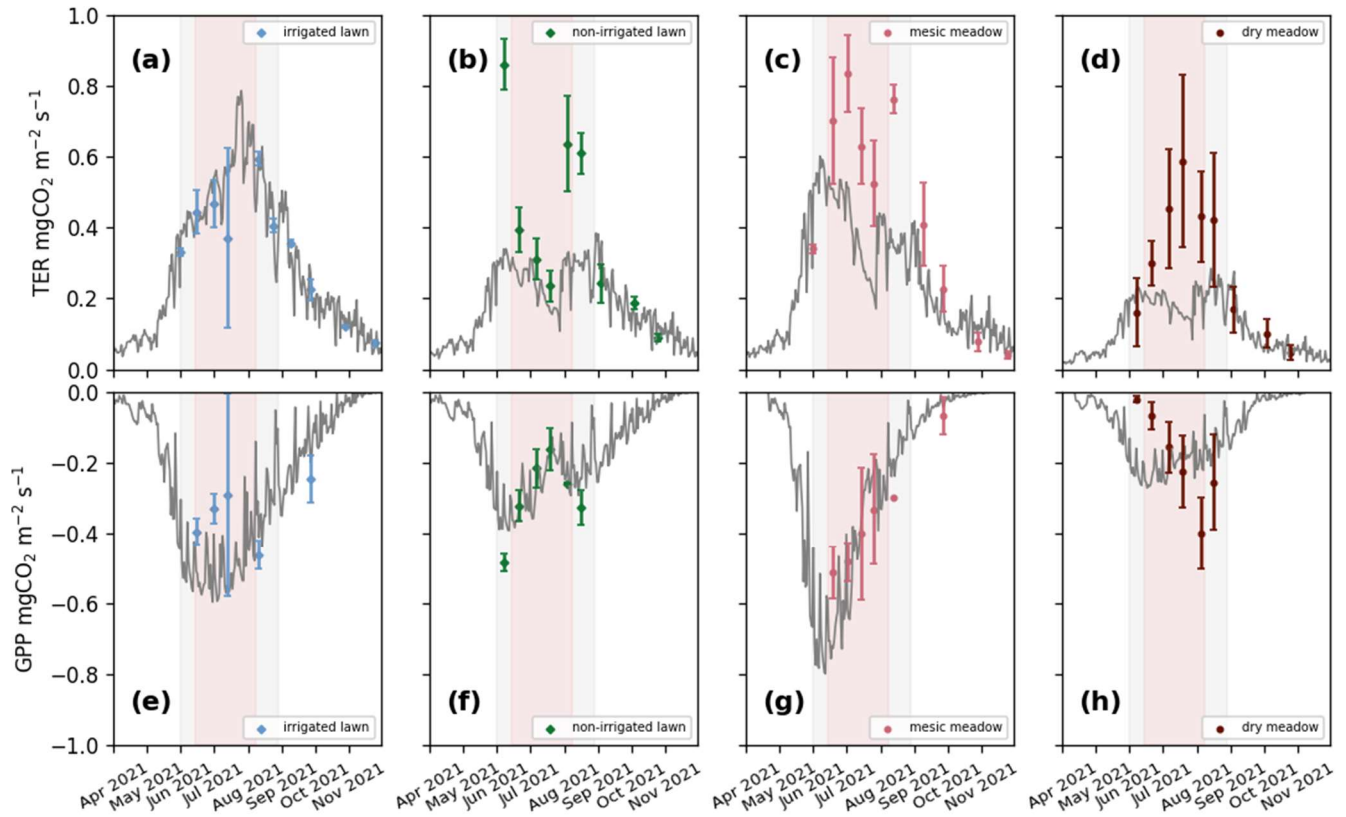

Figure S5. Seasonal dynamics of mean total ecosystem respiration (TER, abcd) and daily photosynthesis (GPP, efgh) in the four intensive sites in 2021. Grey continuous lines represent JSBACH simulations and diamonds and dots represent the mean of manual measurements with standard deviation bars. (a, e) Irrigated lawn = KMP lawn; (b, f) non-irrigated lawn = VKI lawn; (c, g) mesic meadow = KMP meadow; (d, h) dry meadow = VKI meadow. Red rectangles indicate the drought periods according to the SPEI and light grey rectangles represent the summer season.

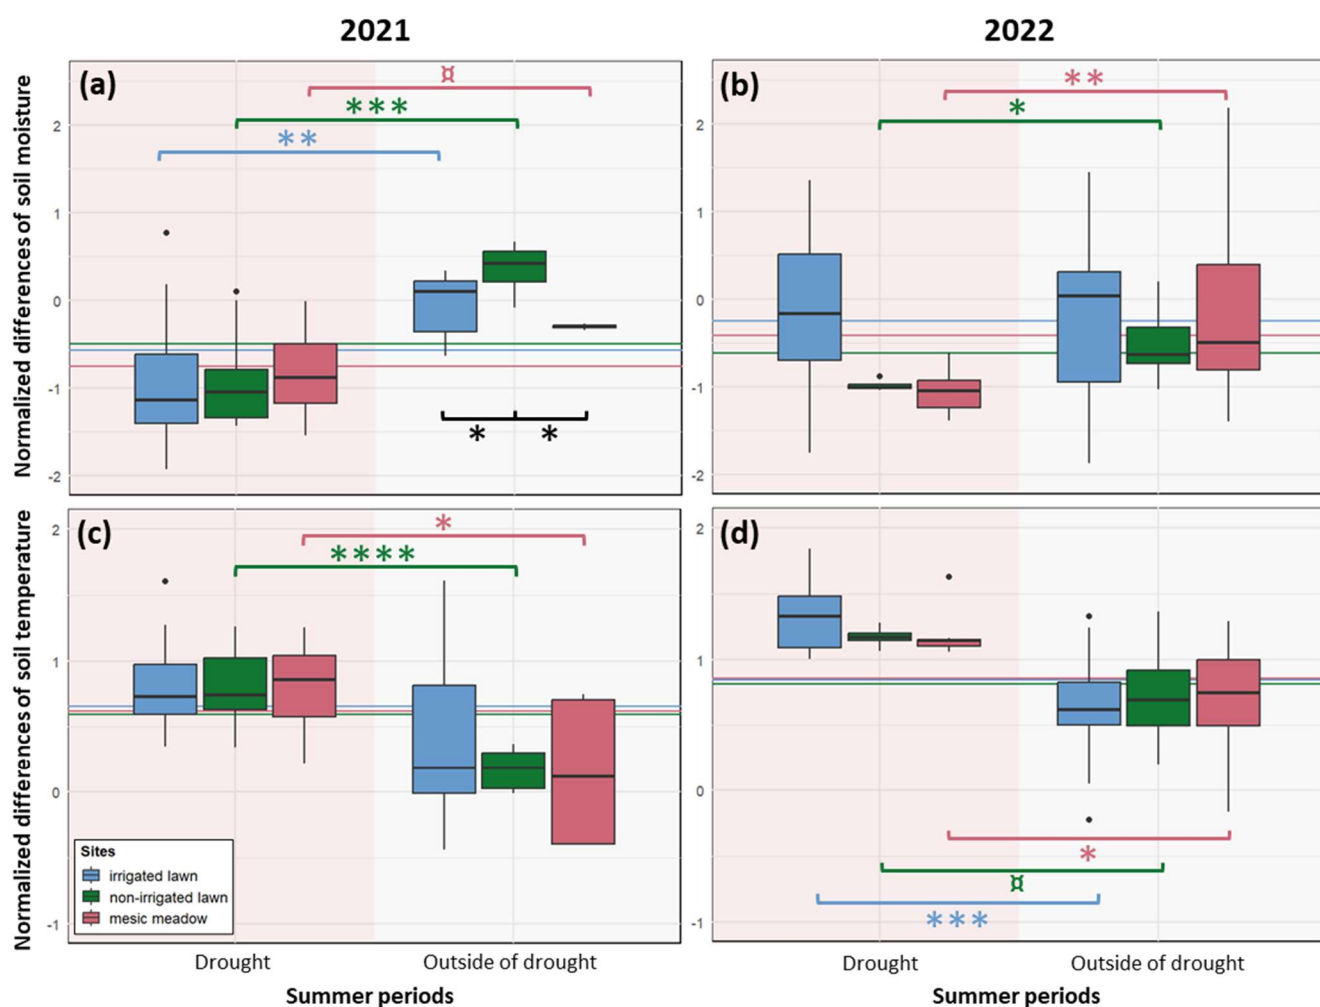

Figure S6. The resistance indices of lawns and meadows to drought events in 2021 and 2022, where irrigated lawn is KMP lawn, non-irrigated lawn is VKI lawn, mesic meadow is KMP meadow, and dry meadow is VKI meadow. The values are normalized differences between the measured values during the drought and outside it between June to August in 2021 (first column) and in 2022 (second column), calculated for the soil moisture at 5 cm depth ((a) and (b)) and the soil temperature at 10 cm depth ((c) and (d)). Horizontal lines represent the summer average of each site. Droughts were defined in Fig. 2 (June 14<sup>th</sup>–August 8<sup>th</sup>, 2021 and June 27<sup>th</sup>–July 17<sup>th</sup>, 2022). (□ for p-value ≤ 0.10; \* for p-value ≤ 0.05; \*\* for p-value ≤ 0.01; \*\*\* for p-value ≤ 0.001; and \*\*\*\* for a p-value ≤ 0.0001).

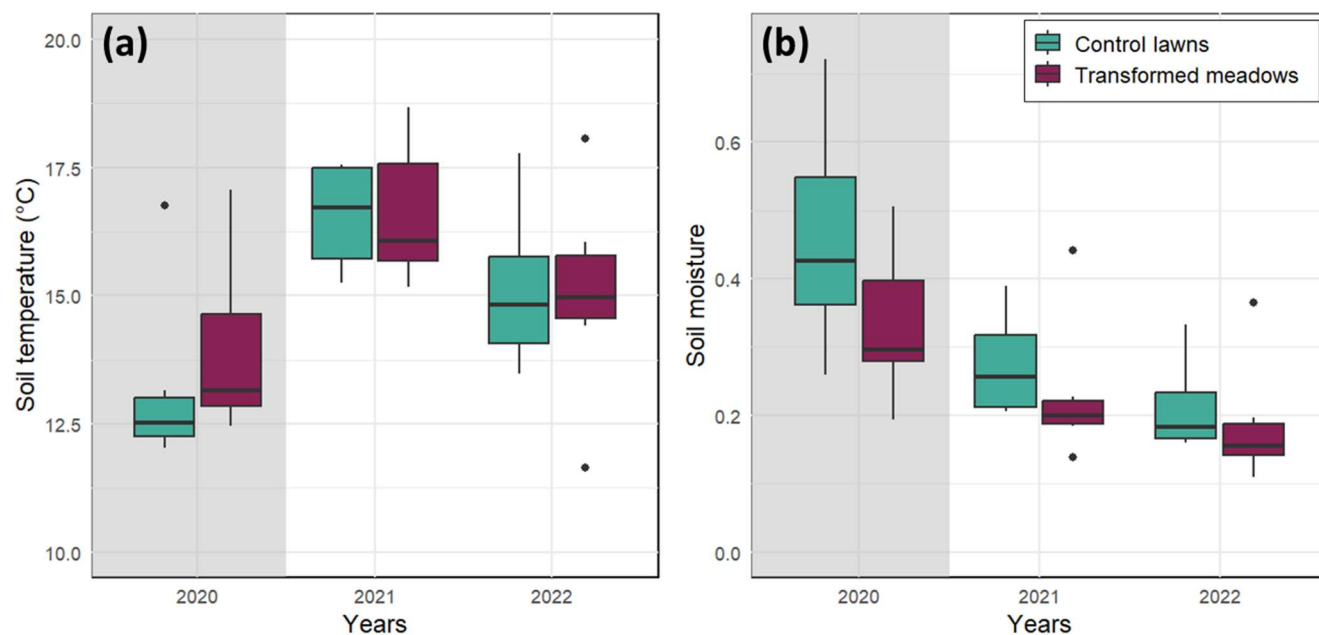

Figure S7. (a) soil temperature at 10 cm depth, and (b) soil moisture at 5 cm depth measured on the satellite sites before and after transformation, which happened in the end of 2020 only on the transformed lawns ( $\square$  for  $p\text{-value} \leq 0.10$ ; and \* for  $p\text{-value} \leq 0.05$ ).
