# Supplementary material for: Lawns and meadows in urban green space – A comparison from greenhouse gas, drought resilience and biodiversity perspectives
Source: Copernicus journal article supplement (doi:10.5194/bg-2023-107), 2023-07-28
Supplement: Supplementary file [file bg-2023-107-AC2-supplement.pdf]

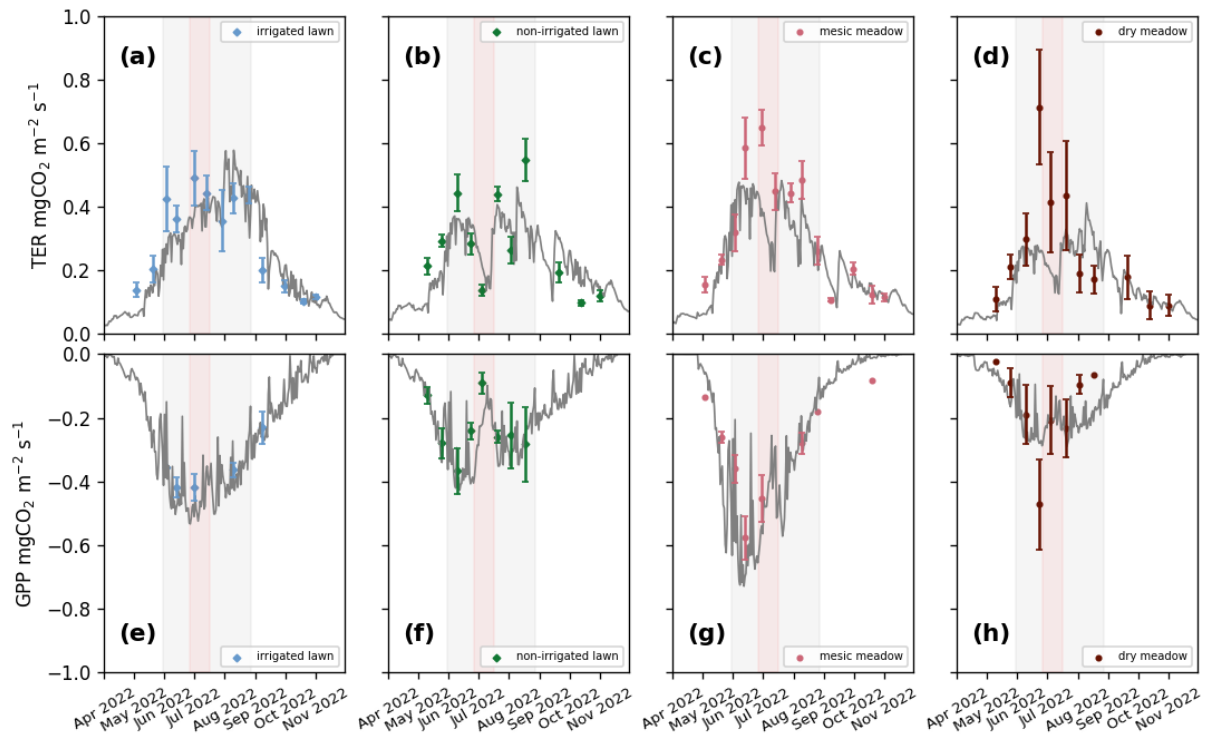

**Figure 1: Seasonal dynamics of mean total ecosystem respiration (TER, abcd) and daily photosynthesis (GPP, efgh) in the four intensive sites in 2022. Grey continuous lines represent JSBACH simulations fitted for the year 2022 and diamonds and dots represent the mean of manual measurements with standard deviation bars. (a, e) Irrigated lawn = KMP lawn; (b, f) non-irrigated lawn = VKI lawn; (c, g) mesic meadow = KMP meadow; (d, h) dry meadow = VKI meadow. Red rectangles indicate the drought periods according to the SPEI and light grey rectangles represent the summer season. The model simulates the whole year but for clarity, Jan-March and Dec are not visible as there were no measurements during those months.**
